# Supplementary material for: Association between Prostate-Specific Antigen and Cardiovascular Diseases in U.S. Adult Men: A Cross-Sectional Study from NHANES
Source: Research Square preprint supplement (doi:10.21203/rs.3.rs-4859544/v2), 2026-01-12
Supplement: Supplementary file 1 [file 09be8fc4048f562a9e74c98a.docx]

**Covariates**

The covariates were included in the analysis to adjust for potential confounders in the relationship between PSA levels and cardiovascular disease (CVD).In this study, main characteristics of participants were collected, including race/ethnicity, marital status, smoking status, drinking status, body mass index (BMI),waist,poverty-to-income ratio(PIR) and diabetes status.

Race/ethnicity, marital status, education, the ratio of family income to poverty (PIR) were obtained from the demographic variables from NHANES. Race/ethnicity categories were derived from the variable RIDRETH1 and simplified into four groups: Non-Hispanic White, Hispanic, Non-Hispanic Black, and Other. Marital status was classified as Married or Unmarried. Education was derived from the variable DMDEDUC2 and categorized as <high school, high school diploma, Associate of Arts or high(AA or high). PIR was derived from the variable INDFMPIR and categorized as less than or equal to 1, 1 to 3, or greater than 3.Smoking status was obtained from variable SMQ020 and SMQ040 and mutated as Never smoker (participants who had smoked fewer than 100 cigarettes in their lifetime), Former smoker (participants who had smoked at least 100 cigarettes but had quit), and Current smoker. Drinking status was obtained from variable ALQ100 and ALQ101 divided into Drinker (participants who had consumed at least 12 alcoholic beverages in the past year) and Non-Drinker (participants who had consumed fewer than 12 alcoholic beverages in the past year or never drank).Body mass index (BMI) was obtained from variable BMXBMI and c categorized as BMI ≥30 or BMI <30. Waist circumference was obtained from variable BMIWAIST and measured in centimeters. Diabetes status was determined based on self-reported physician diagnoses from the diabetes questionnaire (DIQ) and divided into Diabetic and Non-Diabetic.

**Data Acquisition**

Data on CVD were obtained through the NHANES Medical Conditions Questionnaire (MCQ), which involves self-reported physician diagnoses.
