# Supplementary material for: Association between Prostate-Specific Antigen and Cardiovascular Diseases in U.S. Adult Men: A Cross-Sectional Study from NHANES
Source: Research Square preprint supplement (doi:10.21203/rs.3.rs-4859544/v2), 2026-01-12
Supplement: Supplementary file 2 [file 918d7c71ff746f19fcbfa21e.xlsx]

## Sheet: Sheet1
Table 4. Risk Ratios of Outcome Across Quartiles of the Variable in Different Models
	Q1	Q2	Q3	Q4	P trend
Model 1	Ref	0.88 [0.72;1.08]	1.26 [1.04;1.53]	2.06 [1.72;2.47]	<0.001
Model 2	Ref	1.11 [0.81-1.51]	1.37 [1.05;1.78]	2.55 [1.98;3.29]	<0.001
Model 1:Non-adjusted
Model 2:Adjusted for race,BMI,waist,smoke,alcohol intake,PIR,education,,marital status and diabetes
