# Supplementary material for: Association between Prostate-Specific Antigen and Cardiovascular Diseases in U.S. Adult Men: A Cross-Sectional Study from NHANES
Source: Research Square preprint supplement (doi:10.21203/rs.3.rs-4859544/v2), 2026-01-12
Supplement: Supplementary file 3 [file c296ea77d9b60d6021cfb1ce.xlsx]

## Sheet: Sheet1
Table 2. Odds Ratios and 95% Confidence Intervals for CVD by PSA Levels Using Multivariate Logistic Regression
	OR	95%CI	P-value
fPSA
Model 1	1.9	1.48-2.46	<0.001
Model 2	1.71	1.33-2.20	<0.001
tPSA
Model 1	1.09	1.04-1.13	<0.001
Model 2	1.08	1.03-1.12	<0.001
%fPSA
Model 1	1.01	1.00-1.02	0.014
Model 2	1.01	1.00-1.01	0.11
Model 1:Non-adujusted
Model 2:Adjusted for race,BMI,waist,smoke,alcohol inatke,PIR,education,marital status and diabetes
