# Supplementary material for: Association between Prostate-Specific Antigen and Cardiovascular Diseases in U.S. Adult Men: A Cross-Sectional Study from NHANES
Source: Research Square preprint supplement (doi:10.21203/rs.3.rs-4859544/v2), 2026-01-12
Supplement: Supplementary file 4 [file e1843d781200e97748929695.xlsx]

## Sheet: Sheet3
Stratified by fPSA_Quartile
level Q1 Q2 Q3 Q4 p test
n 1550 1550 1550 1549
Age (mean (SD)) 55.08 (11.67) 55.02 (11.16) 58.73 (12.00) 67.66 (11.10) <0.001
tPSA (mean (SD)) 0.50 (0.31) 0.86 (0.45) 1.41 (0.75) 4.46 (5.35) <0.001
PSA_Ratio (mean (SD)) 28.89 (11.83) 31.33 (12.42) 31.36 (12.56) 29.08 (12.67) <0.001
WAIST (mean (SD)) 104.96 (15.24) 103.17 (14.06) 102.30 (13.17) 103.22 (13.61) <0.001
Cvd_Condition (%) CVD Negative 1320 (85.2) 1343 (86.6) 1271 (82.0) 1140 (73.6) <0.001
CVD Positive 230 (14.8) 207 (13.4) 279 (18.0) 409 (26.4)
Race (%) Non-Hispanic White 823 (53.1) 813 (52.5) 862 (55.6) 938 (60.6) <0.001
Hispanic 405 (26.1) 406 (26.2) 365 (23.5) 276 (17.8)
Non-Hispanic Black 279 (18.0) 280 (18.1) 273 (17.6) 289 (18.7)
Other 43 ( 2.8) 51 ( 3.3) 50 ( 3.2) 46 ( 3.0)
PIR_Level (%) <1 268 (17.3) 256 (16.5) 194 (12.5) 228 (14.7) <0.001
1-3 610 (39.4) 580 (37.4) 626 (40.4) 673 (43.4)
>3 672 (43.4) 714 (46.1) 730 (47.1) 648 (41.8)
Marital_Status (%) Married 1095 (70.6) 1183 (76.3) 1152 (74.3) 1132 (73.1) 0.004
Unmarried 455 (29.4) 367 (23.7) 398 (25.7) 417 (26.9)
Drinking_Status (%) Non-Drinker 249 (16.1) 273 (17.6) 267 (17.2) 306 (19.8) 0.055
Drinker 1301 (83.9) 1277 (82.4) 1283 (82.8) 1243 (80.2)
Smoking_Status (%) Never smoker 552 (35.6) 609 (39.3) 585 (37.7) 587 (37.9) <0.001
Former smoker 546 (35.2) 563 (36.3) 606 (39.1) 731 (47.2)
Current smoker 452 (29.2) 378 (24.4) 359 (23.2) 231 (14.9)
Education_Status (%) <High school 448 (28.9) 476 (30.7) 447 (28.8) 497 (32.1) 0.144
High school diploma 379 (24.5) 363 (23.4) 345 (22.3) 370 (23.9)
AA or high 723 (46.6) 711 (45.9) 758 (48.9) 682 (44.0)
Diabetes_Status (%) Non-Diabetic 1296 (83.6) 1354 (87.4) 1330 (85.8) 1279 (82.6) 0.001
Diabetic 254 (16.4) 196 (12.6) 220 (14.2) 270 (17.4)

## Sheet: Sheet2
Table 3. Baseline characteristics of patients with CVD according to quartiles of fPSA in NHANES 2001-2010
	Q1	Q2	Q3	Q4	P-value
Age,years	55.08 (11.67)	55.02 (11.16)	58.73 (12.00)	67.66 (11.10)	<0.001
tPSA , ng/ml	0.50 (0.31)	0.86 (0.45)	1.41 (0.75)	4.46 (5.35)	<0.001
%fPSA, %	28.89 (11.83)	31.33 (12.42)	31.36 (12.56)	29.08 (12.67)	<0.001
Waist, cm	104.96 (15.24)	103.17 (14.06)	102.30 (13.17)	103.22 (13.61)	<0.001
CVD Condition, n (%)					<0.001
Non-CVD	1320 (85.2%)	1343 (86.6%)	1271 (82.0%)	1140 (73.6%)
CVD	230 (14.8%)	207 (13.4%)	279 (18.0%)	409 (26.4%)
Race,n (%)					<0.001
Non-Hispanic White	823 (53.1%)	813 (52.5%)	862 (55.6%)	938 (60.6%)
Hispanic	405 (26.1%)	406 (26.2%)	365 (23.5%)	276 (17.8%)
Non-Hispanic Black	279 (18.0%)	280 (18.1%)	273 (17.6%)	289 (18.7%)
Other	43 (2.8%)	51 (3.3%)	50 (3.2%)	46 (3.0%)
PIR Level,n (%)					<0.001
<1	268 (17.3%)	256 (16.5%)	194 (12.5%)	228 (14.7%)
1-3	610 (39.4%)	580 (37.4%)	626 (40.4%)	673 (43.4%)
>3	672 (43.4%)	714 (46.1%)	730 (47.1%)	648 (41.8%)
Marital Status,n (%)					0.004
Married	1095 (70.6%)	1183 (76.3%)	1152 (74.3%)	1132 (73.1%)
Unmarried	455 (29.4%)	367 (23.7%)	398 (25.7%)	417 (26.9%)
Drinking Status,n (%)					0.055
Non-Drinker	249 (16.1%)	273 (17.6%)	267 (17.2%)	306 (19.8%)
Drinker	1301 (83.9%)	1277 (82.4%)	1283 (82.8%)	1243 (80.2%)
Smoking Status,n(%)					<0.001
Never smoker	552 (35.6%)	609 (39.3%)	585 (37.7%)	587 (37.9%)
Former smoker	546 (35.2%)	563 (36.3%)	606 (39.1%)	731 (47.2%)
Current smoker	452 (29.2%)	378 (24.4%)	359 (23.2%)	231 (14.9%)
BMI,n (%)					<0.001
No	944 (60.9%)	992 (64.0%)	1055 (68.1%)	1105 (71.3%)
≥30	606 (39.1%)	558 (36.0%)	495 (31.9%)	444 (28.7%)
Education Status,n (%)					0.144
<High school	448 (28.9%)	476 (30.7%)	447 (28.8%)	497 (32.1%)
High school diploma	379 (24.5%)	363 (23.4%)	345 (22.3%)	370 (23.9%)
AA or high	723 (46.6%)	711 (45.9%)	758 (48.9%)	682 (44.0%)
Diabetes Status,n (%)					0.001
Non-Diabetic	1296 (83.6%)	1354 (87.4%)	1330 (85.8%)	1279 (82.6%)
Diabetic	254 (16.4%)	196 (12.6%)	220 (14.2%)	270 (17.4%)
Data are expressed as mean ± stand error or frequency (percentage).
