# Supplementary material for: Association between Prostate-Specific Antigen and Cardiovascular Diseases in U.S. Adult Men: A Cross-Sectional Study from NHANES
Source: Research Square preprint supplement (doi:10.21203/rs.3.rs-4859544/v2), 2026-01-12
Supplement: Supplementary file 5 [file eccc561e5862a6b1d9ad8b08.xlsx]

## Sheet: Sheet1
Group diferences between CVD and non-CVD groups
level Overall CVD Negative CVD Positive p test
n 6199 5074 1125
Age (mean (SD)) 59.12 (12.59) 57.09 (12.04) 68.28 (10.84) <0.001
fPSA (mean (SD)) 0.43 (0.56) 0.41 (0.55) 0.55 (0.60) <0.001
tPSA (mean (SD)) 1.81 (3.13) 1.72 (3.02) 2.21 (3.58) <0.001
PSA_Ratio (mean (SD)) 30.16 (12.43) 29.77 (12.12) 31.93 (13.62) <0.001
WAIST (mean (SD)) 103.41 (14.07) 102.61 (13.86) 107.03 (14.44) <0.001
Race (%) Non-Hispanic White 3436 (55.4) 2691 (53.0) 745 (66.2) <0.001
Hispanic 1452 (23.4) 1282 (25.3) 170 (15.1)
Non-Hispanic Black 1121 (18.1) 941 (18.5) 180 (16.0)
Other 190 ( 3.1) 160 ( 3.2) 30 ( 2.7)
PIR_Level (%) <1 946 (15.3) 771 (15.2) 175 (15.6) <0.001
1-3 2489 (40.2) 1953 (38.5) 536 (47.6)
>3 2764 (44.6) 2350 (46.3) 414 (36.8)
Marital_Status (%) Married 4562 (73.6) 3766 (74.2) 796 (70.8) 0.019
Unmarried 1637 (26.4) 1308 (25.8) 329 (29.2)
Drinking_Status (%) Non-Drinker 1095 (17.7) 867 (17.1) 228 (20.3) 0.013
Drinker 5104 (82.3) 4207 (82.9) 897 (79.7)
Smoking_Status (%) Never smoker 2333 (37.6) 2023 (39.9) 310 (27.6) <0.001
Former smoker 2446 (39.5) 1850 (36.5) 596 (53.0)
Current smoker 1420 (22.9) 1201 (23.7) 219 (19.5)
BMI group (%) No 4096 (66.1) 3414 (67.3) 682 (60.6) <0.001
>=30 2103 (33.9) 1660 (32.7) 443 (39.4)
Education_Status (%) <High school 1868 (30.1) 1471 (29.0) 397 (35.3) <0.001
High school diploma 1457 (23.5) 1205 (23.7) 252 (22.4)
AA or high 2874 (46.4) 2398 (47.3) 476 (42.3)
Diabetes_Status (%) Non-Diabetic 5259 (84.8) 4445 (87.6) 814 (72.4) <0.001
Diabetic 940 (15.2) 629 (12.4) 311 (27.6)

## Sheet: Sheet2
Table 1. Characteristics of participants
	Overall(n=6199)	Non-CVD(n=5074)	CVD(n=1125)	P-value
Age,years	59.12 (12.59)	57.09 (12.04)	68.28 (10.84)	<0.001
fPSA,ng/ml	0.43 (0.56)	0.41 (0.55)	0.55 (0.60)	<0.001
tPSA ,ng/ml	1.81 (3.13)	1.72 (3.02)	2.21 (3.58)	<0.001
%fPSA,%	30.16 (12.43)	29.77 (12.12)	31.93 (13.62)	<0.001
Waist,cm	103.41 (14.07)	102.61 (13.86)	107.03 (14.44)	<0.001
Race,n (%)				<0.001
Non-Hispanic White	3436 (55.4%)	2691 (53.0%)	745 (66.2%)
Hispanic	1452 (23.4%)	1282 (25.3%)	170 (15.1%)
Non-Hispanic Black	1121 (18.1%)	941 (18.5%)	180 (16.0%)
Other	190 ( 3.1%)	160 ( 3.2%)	30 (2.7%)
PIR,n (%)				<0.001
<1	946 (15.3%)	771 (15.2%)	175 (15.6%)
1-3	2489 (40.2%)	1953 (38.5%)	536 (47.6%)
>3	2764 (44.6%)	2350 (46.3%)	414 (36.8%)
Marital Status,n (%)				0.019
Married	4562 (73.6%)	3766 (74.2%)	796 (70.8%)
Unmarried	1637 (26.4%)	1308 (25.8%)	329 (29.2%)
Drinking Status,n (%)				0.013
Drinker	1095 (17.7%)	867 (17.1%)	228 (20.3%)
Non-Drinker	5104 (82.3%)	4207 (82.9%)	897 (79.7%)
Smoking Status, n (%)				<0.001
Never smoker	2333 (37.6%)	2023 (39.9%)	310 (27.6%)
Former smoker	2446 (39.5%)	1850 (36.5%)	596 (53.0%)
Current smoker	1420 (22.9%)	1201 (23.7%)	219 (19.5%)
BMI,n (%)				<0.001
≥30	2103 (33.9%)	1660 (32.7%)	443 (39.4%)
No	4096 (66.1%)	3414 (67.3%)	682 (60.6%)
Education,n (%)				<0.001
<High school	1868 (30.1%)	1471 (29.0%)	397 (35.3%)
High school diploma	1457 (23.5%)	1205 (23.7%)	252 (22.4%)
AA or high	2874 (46.4%)	2398 (47.3%)	476 (42.3%)
Diabetes,n (%)				<0.001
Yes	940 (15.2%)	629 (12.4%)	311 (27.6%)
No	5259 (84.8%)	4445 (87.6%)	814 (72.4%)
Data are expressed as mean ± stand error or frequency (percentage).
